# Supplementary material
Source: MDPI journal article supplement (https://www.mdpi.com/2813-3757/1/4/18)
Supplement: s1 [file s1]

Archive with 3 entries (3 files):
- Figure_S1.pdf
- Figure_S2.pdf
- Video_S1.mp4
